# Supplementary material for: Facile synthesis of Pt nanoparticles supported on anatase TiO2 nanotubes with good photo-electrocatalysis performance for methanol
Source: Royal Society of Chemistry journal article supplement (doi:10.1039/c7ra11564d), 2017-01-01
Supplement: c7ra11564d1.pdf [file c7ra11564d1.pdf]

**Facile synthesis of Pt nanoparticles supported on anatase TiO<sub>2</sub> nanotubes with  
good photo-electrocatalysis performance for methanol**

Jianbo Zhang<sup>a,b,c,#</sup>, Nan Su<sup>a,b,c,#</sup>, Xiulan Hu<sup>a,b,c,\*</sup>, Faquan Zhu<sup>a,b,c</sup>, Yawei Yu<sup>a,b,c</sup>, Hui  
Yang<sup>a,b,c</sup>

<sup>a</sup> College of Materials Science and Engineering, Nanjing Tech University, Xin-Mo-  
Fan Road No. 5, 210009, Nanjing, Jiangsu, China

<sup>b</sup> The Synergetic Innovation Center for Advanced Materials, Xin-Mo-Fan Road No. 5,  
210009, Nanjing, Jiangsu, China

<sup>c</sup> Jiangsu National Synergetic Innovation Center for Advanced Materials (SICAM),  
Xin-Mo-Fan Road No. 5, 210009, Nanjing, Jiangsu, China

\* Correspondence information: Xiulan Hu, College of Materials Science and  
Engineering, Nanjing Tech University, Xin-Mo-Fan Road No. 5, 210009, Nanjing,  
Jiangsu, China, whoxiulan@163.com, +86 152 4022 7230

# Nan Su and Jianbo Zhang are co-first authors.

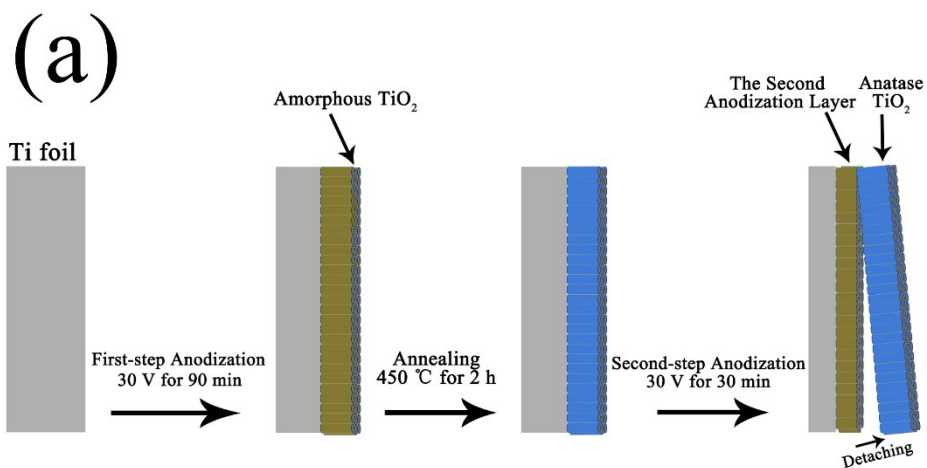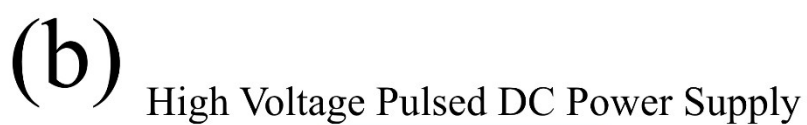

**Fig. S1.** Schematic illustration of two-step anodization method to prepare  $\text{TiO}_2$  nanotubes (a); Schematic illustration of a solution plasma sputtering technique for the preparation of Pt nanoparticles (b).

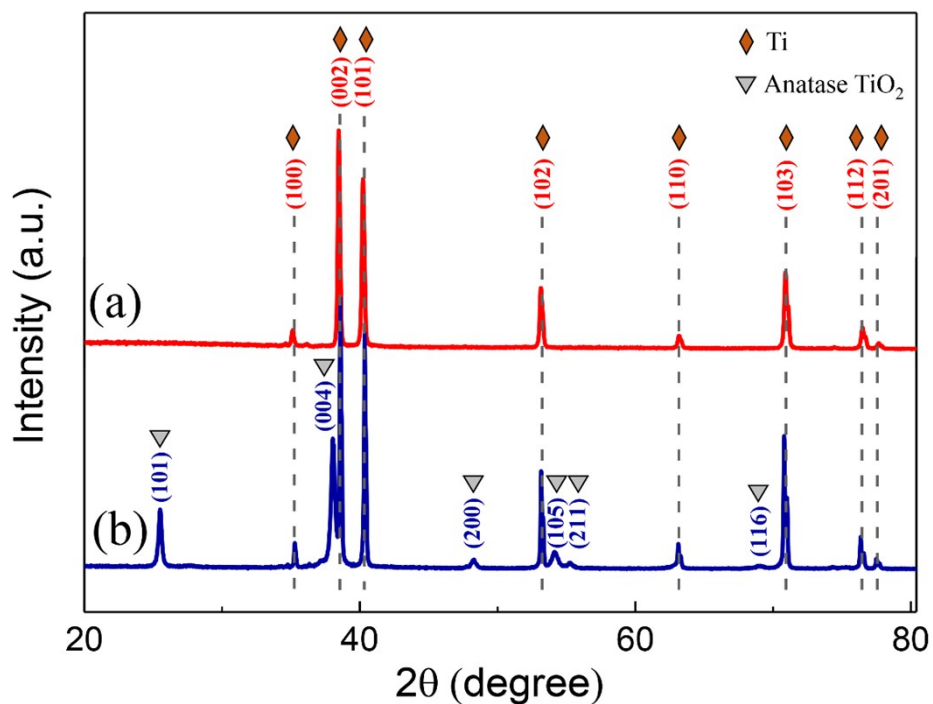

**Fig. S2.** XRD patterns of two Ti foil which directly obtained after first-step anodization (a) and obtained after annealing process (b).

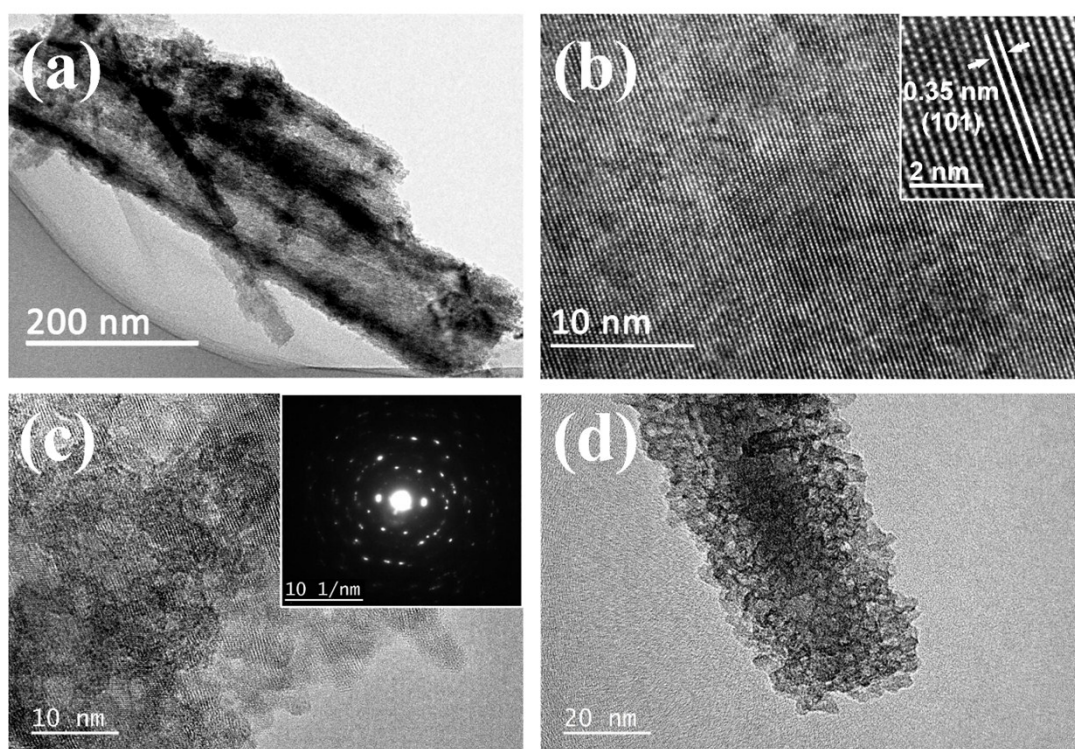

**Fig. S3.** (a) Typical TEM image of as-prepared TNTs. High-resolution TEM (HR-TEM) image of the TNTs inner part (b) and edge part (c). (d) TEM image of a broken tip of a TNT. The insets of (b) and (c) are the high magnification image and corresponding SAED analysis, respectively.

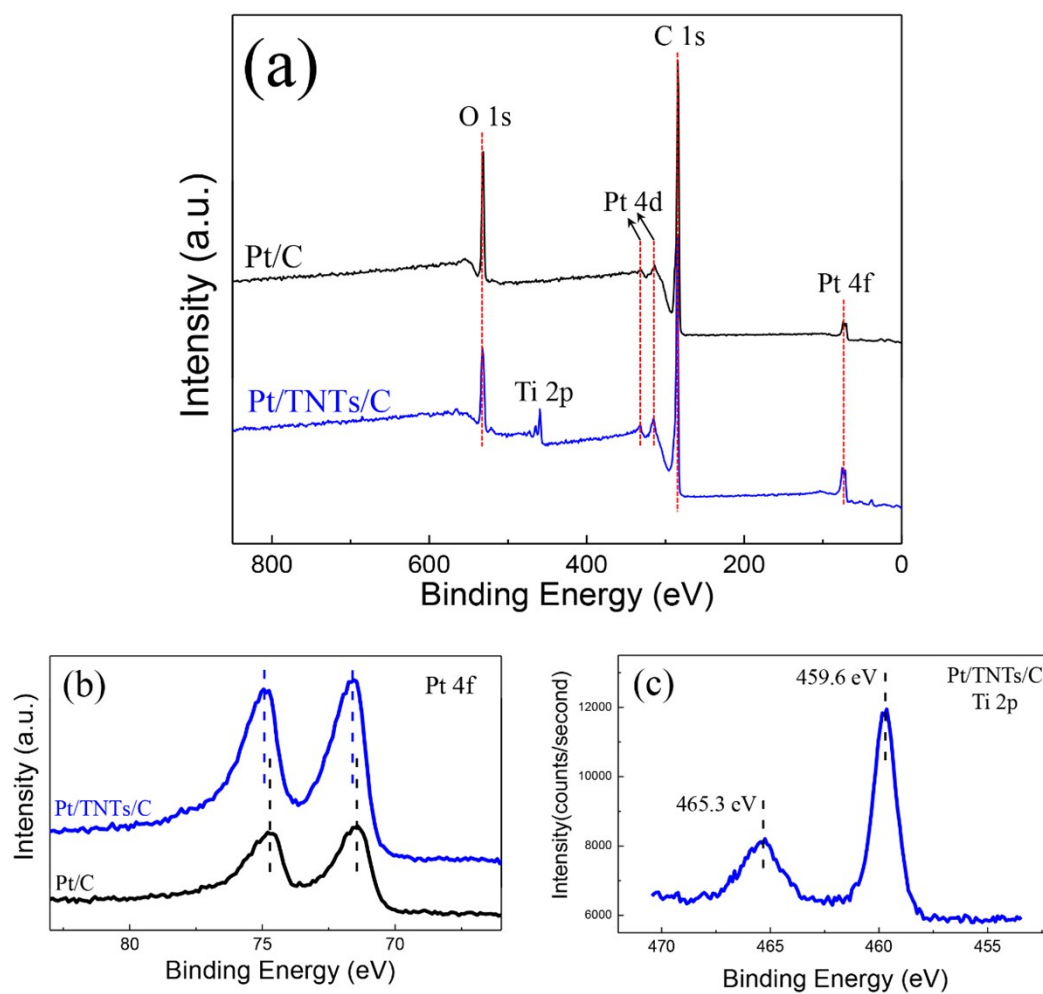

**Fig. S4.** (a) XPS spectra of the wide surveys for the Pt/C and Pt/TNTs/C composites; (b) Pt 4f for the Pt/C and Pt/TNTs/C; (c) Ti 2p for the Pt/TNTs/C.
